**Title:** Racial disparities in COVID-19 mortality are driven by unequal infection risks.

**Authors:**

Jon Zelner, PhD (1)\*; Rob Trangucci, MS (2); Ramya Narahariseti, MS (1); Alex Cao, MS (3); Ryan Malosh, PhD (4); Kelly Broen, MPH (1); Nina Masters, MPH (4); Paul Delamater, PhD (5)

**Affiliations:**

1. Dept. of Epidemiology  
Center for Social Epidemiology and Public Health (CSEPH)  
University of Michigan School of Public Health  
1615 Washington Heights, Ann Arbor, MI, USA 48109

2. Dept. of Statistics  
University of Michigan  
1085 South University  
Ann Arbor, MI 48109, USA

3. Consulting for Statistics, Computing & Analytics Research (CSCAR)  
University of Michigan  
3550 Rackham Building  
915 E. Washington St.  
Ann Arbor, MI, USA 48109

4. Dept. of Epidemiology  
University of Michigan School of Public Health  
1615 Washington Heights, Ann Arbor, MI, USA 48109

5. Department of Geography  
University of North Carolina at Chapel Hill  
Carolina Hall  
Campus Box 3220  
Chapel Hill, NC, USA, 27599

\*Corresponding Author

**Author Contributions:** JZ, RT conceptualized and completed data analysis; JZ, RT, RN, AC, NM, PD participated in data preparation and cleaning; all authors participated in the writing and editing of the final manuscript.

**Acknowledgments:** The authors gratefully acknowledge the efforts and insight of Sarah Lyon-Callo, Jim Collins, and other members of the Michigan Dept. of Health and Human Services, as well as the input of Emily Martin, Marisa Eisenberg and Sharon Kardia at the University of Michigan.

**Funding:** This work was supported by a *COVID-PODS* grant from the Michigan Institute for Data Science (MIDAS) at the University of Michigan and the *MCubed* program at the University of Michigan. The funding sources had no role in the preparation of this manuscript.

## 1 Introduction

2 As of September 1, 2020, there have been more than 180K deaths and 6M confirmed and probable cases attributable to  
3 SARS-CoV-2 in the United States, with these numbers undoubtedly reflecting a substantial underestimate of the true  
4 toll. Geographic, racial-ethnic, age and socioeconomic disparities in mortality have been key features of the first and  
5 second wave of the U.S. COVID-19 epidemic.<sup>1-5</sup> However, the extent to which this differential mortality is driven  
6 by evident disparities in rates of infection by age, race, and socioeconomic status, or some combination thereof,  
7 remains unknown. Addressing the clear inequities in the toll of death resulting from the COVID-19 pandemic in the  
8 U.S. requires disaggregating the relative role of exposure leading to infection versus age-specific case-fatality rates  
9 in drivers of the gaping inequity characteristic of SARS-CoV-2 mortality in the United States.

10 Earlier analyses of other respiratory viruses, such as RSV and influenza, have documented race-ethnic disparities in  
11 both rates of infection and case-fatality.<sup>6</sup> This inequality is driven by diverse factors including comorbid conditions  
12 that increase susceptibility to infection as well as disease severity. But it is also a function of structural factors that  
13 impact the ability of different groups to avoid infection. Relevant factors include mass incarceration,<sup>7,8</sup> residential  
14 segregation<sup>9,10</sup> and wealth inequality that facilitates social distancing among the well-off while poorer individuals  
15 are more likely to be compelled into 'essential work'.<sup>11</sup> A recent cross-national systematic review placed the average  
16 infection fatality ratio (IFR) of COVID-19 infection at 0.75%.<sup>12</sup> However, population age structure is key to shaping  
17 the crude mortality rate and total number of deaths from the pandemic, and age-specific variation in the prevalence  
18 of underlying conditions is likely to have a dramatic impact on age-specific patterns of mortality.<sup>13</sup> While some stud-  
19 ies have illustrated the differential impact of SARS-CoV-2 on non-White populations in the U.S. using aggregated  
20 data,<sup>5</sup> there are no analyses that provide a clear breakdown of these risks by age, sex, and race.<sup>14</sup> In the current  
21 analysis, we aim to partially close this gap by analyzing patterns of age, sex, and race-specific SARS-CoV-2 infection  
22 and mortality using detailed case-level data from the U.S. state of Michigan, which was particularly hard-hit in by  
23 SARS-CoV-2 in the winter and spring of 2020, and where the epidemic has been marked by unmistakable racial and  
24 socioeconomic inequality.

## 25 Data

26 We used data from 73,441 people with confirmed and probable COVID-19 infections from the Michigan Disease  
27 Surveillance System (MDSS) from March 8<sup>th</sup>, 2020 through July 5<sup>th</sup>, 2020. Each case in MDSS is tagged with a unique  
28 identifier, sex at birth, age, race, the date their case was referred to MDHHS, whether the individual died, and the  
29 date of death. In order to mitigate the impact of right censored deaths on our case-fatality rate estimates,<sup>15</sup> we  
30 truncated the data at the 97.5% quantile of time to death from case referral date, or forty-six days. This results in  
31 truncating all data with a case referral date later than May 20<sup>th</sup>, 2020, after which our data comprise 58,428 individ-  
32 uals.

33 From this dataset, we excluded 25 cases that did not reside in Michigan or were missing a state of residence, 8,613  
34 people for whom race or ethnicity was not recorded, and 27 people who did not have age recorded or had age  
35 > 116 years old indicating entry errors. We combined 68 pairs of records that had duplicate patient identification  
36 numbers, resulting in 34 fewer cases. Finally, we dropped 28 patients whose sex at birth was unknown, leading to a  
37 final dataset of 49,701 people with a confirmed or probable COVID-19 infection, with known age, race or ethnicity,  
38 state of residence, sex at birth, and state prisoner status.

39 After filtering the individual-level MDSS case data, we binned age by 10 year intervals to age 80, while we combined  
40 ages 80 and above in one bin. We also created the race/ethnicity categories of Black/African American, Latino,  
41 Asian/Pacific Islander, Native American, Other, and White, where Other comprised the census category of 'other',  
42 and mixed race people. In order to model per-capita rates of disease we used tract-level population data from the  
43 2010 U.S. Census aggregated to the state level for Michigan to define the population in each age-sex-race stratum.

## 44 Methods

45 **COVID-19 cumulative incidence rates.** To calculate age-specific rates of COVID-19 infection in each age ( $i$ ), sex  
46 ( $j$ ), race ( $k$ ) bin, per 100,000 population, we fit a poisson regression model with a population offset term,  $\log(n_{ijk})$ ,  
47 where  $n_{ijk}$  is the size of the population for the  $ijk$ -th group from the 2010 U.S. Census. We included age x sex, age  
48 x race, and sex x race interaction terms to capture the full spectrum of potential heterogeneity in our outcome data.

49 We denote the observed number of cases in each group as  $y_{ijk}$  and the per-capita cumulative incidence rate in each  
50 bin as  $\lambda_{ijk}$ .

51 **Case-fatality rates.** Age-specific case fatality rates (CFR) were estimated by fitting a binomial model to the number  
52 of deaths ( $z_{ijk}$ ) as a proportion of the number of total cases ( $y_{ijk}$ ) in each age/sex/race bin. We denote the CFR for  
53 each group as  $\rho_{ijk}$ , so,  $z_{ijk} \sim \text{Binomial}(y_{ijk}, \rho_{ijk})$ . For all analyses of per-capita age-specific incidence rates, we  
54 used a log-Gaussian prior distribution with a mean of 0 and standard deviation of 0.1.

55 **Age and sex standardization.** To characterize racial disparities unrelated to differences in population age struc-  
56 ture or sex ratios, we employed a post-stratification approach to direct standardization. Specifically, we generated  
57 weights for each age x sex bin in the data, using the marginal age and sex distribution for the state of Michigan. We  
58 then weighted posterior draws from the incidence and case-fatality models described above to generate adjusted  
59 estimates. Age-adjusted case-fatality ratios (CFRs) in our results characterize the ratio in the overall risk of death if  
60 individuals in the population were infected at a rate proportional to the share of the total population in their same  
61 age/sex bin statewide.

62 **Software.** All analyses were completed in *R* 3.6.3, using the *rstanarm* package<sup>16</sup> for Bayesian regression analysis, the  
63 *tidybayes* package for post-processing<sup>17</sup> and *ggplot2* for visualization.<sup>18</sup>

## 64 Results

65 In our dataset, there are 49,701 probable and confirmed COVID-19 cases, and 5,815 deaths attributable to COVID-  
66 19, for an overall case-fatality rate of 12%. Of these, 19,662 were among individuals identified as Black or African-  
67 American, 23,301 were among individuals identified as White, 1,346 among individuals identified as Asian or Pacific  
68 Islander, 123 among individuals identified as Native American, and 1,612 among individuals identified as belonging  
69 to any other racial/ethnic group in the 2010 U.S. Census.

70 Table 1 shows per-capita case and mortality rates by race/ethnic group, as well as corresponding case-fatality rates.  
71 Notably, the raw incidence rate among all non-White groups is substantially higher than among Whites for all groups  
72 identified in the data except for Native Americans. However, the overall case-fatality rate for Whites is on par with  
73 the case-fatality rate for blacks, potentially owing to different distributions of ages among cases and deaths between  
74 these groups. Among Whites, the average age of all reported cases was 53.4 yrs (53.2, 53.7), slightly older than among  
75 blacks, 51.4 yrs (51.1, 51.6), and significantly older than among Latinos, 38.1 yrs (37.6, 38.6) and those in the “other”  
76 race/ethnicity group. For all groups, the mean age among individuals with COVID-19 listed as their cause of death  
77 was significantly higher than for all cases within the same group. Among Whites, the average age at death was the  
78 greatest, at 79.2 yrs (78.6, 79.9), eight years higher than among Blacks at 71.2 yrs (70.5, 71.9), with Latinos having the  
79 youngest average age at death at 66.7 yrs (63.6, 69.8). Taken together, these results suggest that for Non-Whites other  
80 than Native Americans, the risk of COVID-19 infection was uniformly higher than for Whites. However, because  
81 these groups have differing population age and sex distributions, standardization is necessary to ensure that these  
82 reflect differences in risk rather than being a function of the distribution of population.

83 **Standardized incidence and mortality rates.** Table 2 shows age and sex-standardized incidence and mortality rates  
84 per 100,000 population, and corresponding between-group rate ratios, by race/ethnic group. Rows of the table  
85 are ordered by raw incidence per 100K individuals for comparability with Tables 1. This shows that the general  
86 patterns in the raw incidence and mortality hold after adjustment, although the age and sex-adjusted incidence  
87 among Latinos falls significantly, reflecting the younger average age of cases identified as Latino. The provided

| Race                   | Cases | Cases/100K | Deaths | Deaths/100K | CFR | Avg. Age | Avg. Age Death | % Female |
|------------------------|-------|------------|--------|-------------|-----|----------|----------------|----------|
| Black                  | 19662 | 1421       | 2430   | 176         | 11% | 51       | 71             | 54%      |
| Latino                 | 3657  | 838        | 133    | 30          | 2%  | 38       | 67             | 48%      |
| Other                  | 1612  | 805        | 104    | 52          | 5%  | 45       | 72             | 51%      |
| Asian/Pacific Islander | 1346  | 565        | 76     | 32          | 5%  | 44       | 77             | 52%      |
| White                  | 23301 | 308        | 3064   | 40          | 11% | 53       | 79             | 53%      |
| Native American        | 123   | 226        | 8      | 15          | 5%  | 49       | 74             | 47%      |

Table 1: Descriptive statistics of COVID-19 incidence and mortality by race/ethnicity in Michigan, USA, March-June 2020.

88 incidence rate ratios (IRRs) and mortality rate ratios (MRRs) show the enormous disparity in incidence and mortality  
89 between Blacks and Whites, with an IRR of nearly 6 and an MRR of nearly 7. Again, these IRRs and MRRs reflect  
90 the fact that all groups other than Native Americans had higher rates of incidence and mortality than whites and  
91 that these differences do not simply reflect the age and sex distribution of cases. For Native Americans, rates were  
92 statistically indistinguishable from those for Whites, although this may be due to the very small number of cases  
93 and deaths overall in this group in our data.

94 **Cumulative incidence rates.** Figure 1 shows dramatically higher overall and age-specific incidence rates among  
95 Blacks and individuals in the “Other” race/ethnic category than for whites, particularly at older ages at which  
96 individuals are far more likely to die from their infection. In addition, the horizontal dashed line in each panel of  
97 Figure 1 shows the raw incidence rate for each group, and then dotted line indicates the age-adjusted incidence rate.

98 The extent of these disparities in incidence is clearly in evidence in panel A of Figure 3, which shows the ratio of  
99 the age-specific cumulative incidence rate (incidence rate ratio, IRR) for each race/ethnic group as compared to the  
100 comparable rate for Whites. In this case, rates for all non-White groups are significantly higher, with these disparities  
101 most pronounced at older ages for Blacks, and younger ages for Latinos. The IRR for individuals in the ‘other’ group  
102 was fairly consistent across ages, with a small drop in the 20-40 age range.

103 In the following sections, we will examine age-stratified incidence and mortality rates by race/ethnicity for Blacks,  
104 Latinos, Asians/Pacific Islanders and Whites. Native Americans are excluded from age-stratified analyses due to a  
105 small sample size, as are individuals in the “Other” race/ethnic categorization.

106 **Case-fatality rates.** Figure 2 illustrates the trend in case-fatality rates by age. These are fairly consistent between  
107 groups, with a steadily increasing trend in the probability of death among identified cases from age 50 onwards,  
108 although there are apparent differences in these rates at younger ages as well. These are clearly visible in panel B of  
109 Figure 3, which shows the ratio of the age-specific case-fatality ratio for Blacks, Latinos and those in the ‘other’ group  
110 vs. the case-fatality rate for Whites of the same age. Because of the small number of deaths in individuals < 20 years  
111 of age, these groups are excluded from the figure. For Blacks, all age groups from 30 to 70 years experience higher case-  
112 fatality rates than Whites, with this disparity most pronounced in the 40-49 year age-group. However, for Latinos  
113 and those in the ‘other’ race/ethnic group, there are no significant differences in age-specific case-fatality rates as  
114 compared to Whites. In Figs. 2 & 3, the dashed line indicates raw case-fatality rates, while the dotted line indicates  
115 an age-adjusted estimate of case-fatality assuming an equal probability of infection at all ages of the standardized  
116 population. These results suggest that although there are meaningful differences in case-fatality by race and age,  
117 that the large raw and standardized disparities in COVID-19 mortality cannot be explained by case fatality rates  
118 alone.

119 One way to understand the relative importance of exposure vs. case-fatality on the disparate burden of mortality  
120 by race is to examine the counterfactual scenario in which each race/ethnic group has the age- and sex-specific  
121 COVID-19 incidence rate of the corresponding age/sex group among Whites but their original age- and sex-specific  
122 case-fatality rates. When we do this, we find that this would result in a decrease of 83%, 95% CI = (82%,84%) of  
123 deaths among Blacks, 63%, 95% CI = (53%,72%) among Latinos, and 59%, 95% CI = (46%,69%) among Asian/Pacific  
124 Islanders.

125 These results suggest that while differential case-fatality rates can account for some of the disparity in Black vs. White  
126 mortality rates, the large majority of COVID-19 deaths among African-Americans in Michigan can be attributed to  
127 the large differences in age-specific incidence illustrated in Fig 1. Similarly, although Latinos and Asian/Pacific

| Race                   | Incidence/100K   | IRR           | Mortality/100K | MRR           |
|------------------------|------------------|---------------|----------------|---------------|
| Black                  | 1644 (1621,1668) | 5.6 (5.5,5.7) | 251 (242,262)  | 6.9 (6.5,7.3) |
| Latino                 | 1113 (1074,1152) | 3.8 (3.7,3.9) | 79 (66,94)     | 2.2 (1.8,2.6) |
| Other                  | 1520 (1442,1605) | 5.2 (4.9,5.5) | 152 (124,185)  | 4.2 (3.4,5.1) |
| Asian/Pacific Islander | 695 (654,738)    | 2.4 (2.2,2.5) | 79 (61,99)     | 2.2 (1.7,2.7) |
| White                  | 293 (289,296)    | Ref           | 36 (35,38)     | Ref           |
| Native American        | 254 (209,303)    | 0.9 (0.7,1)   | 26 (12,49)     | 0.7 (0.3,1.3) |

Table 2: Age and sex-standardized incidence and mortality rates and corresponding rate ratios. The table shows incidence rates and mortality rates and 95 percent posterior credible intervals, as well as corresponding standardized incidence rate ratios (IRRs) and mortality rate ratios (MRRs). For all comparisons, the incidence and mortality rate among Whites is used as the reference group.

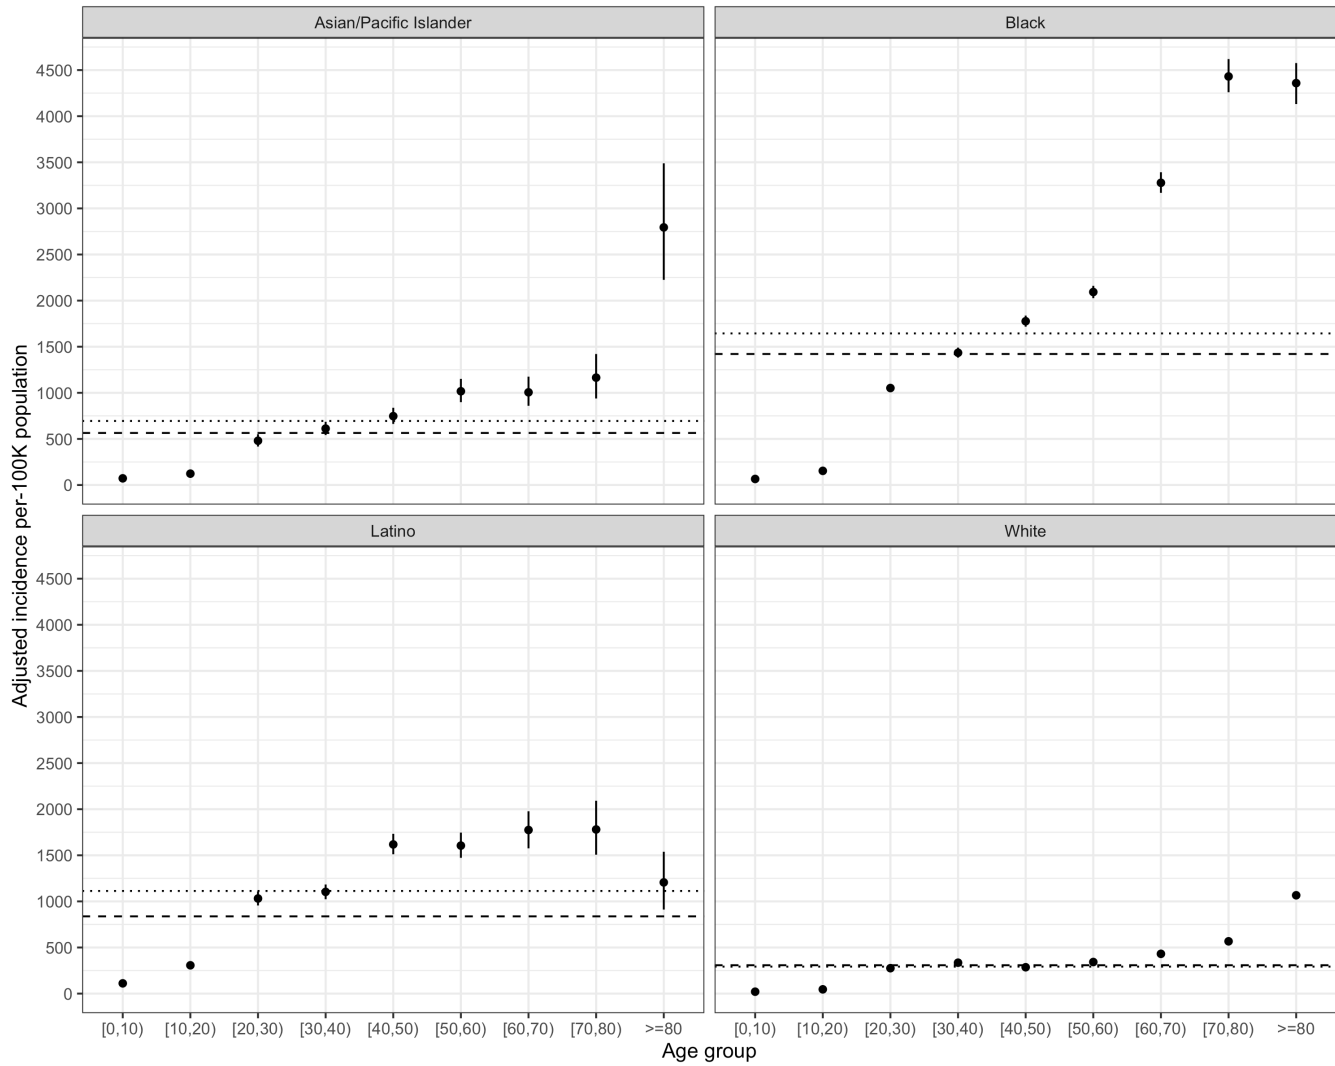

Figure 1: Incidence of COVID-19 infection per 100K population by age and race. Dashed lines indicate the crude overall rate for each group, dotted lines indicate group-specific age and sex-adjusted rates.

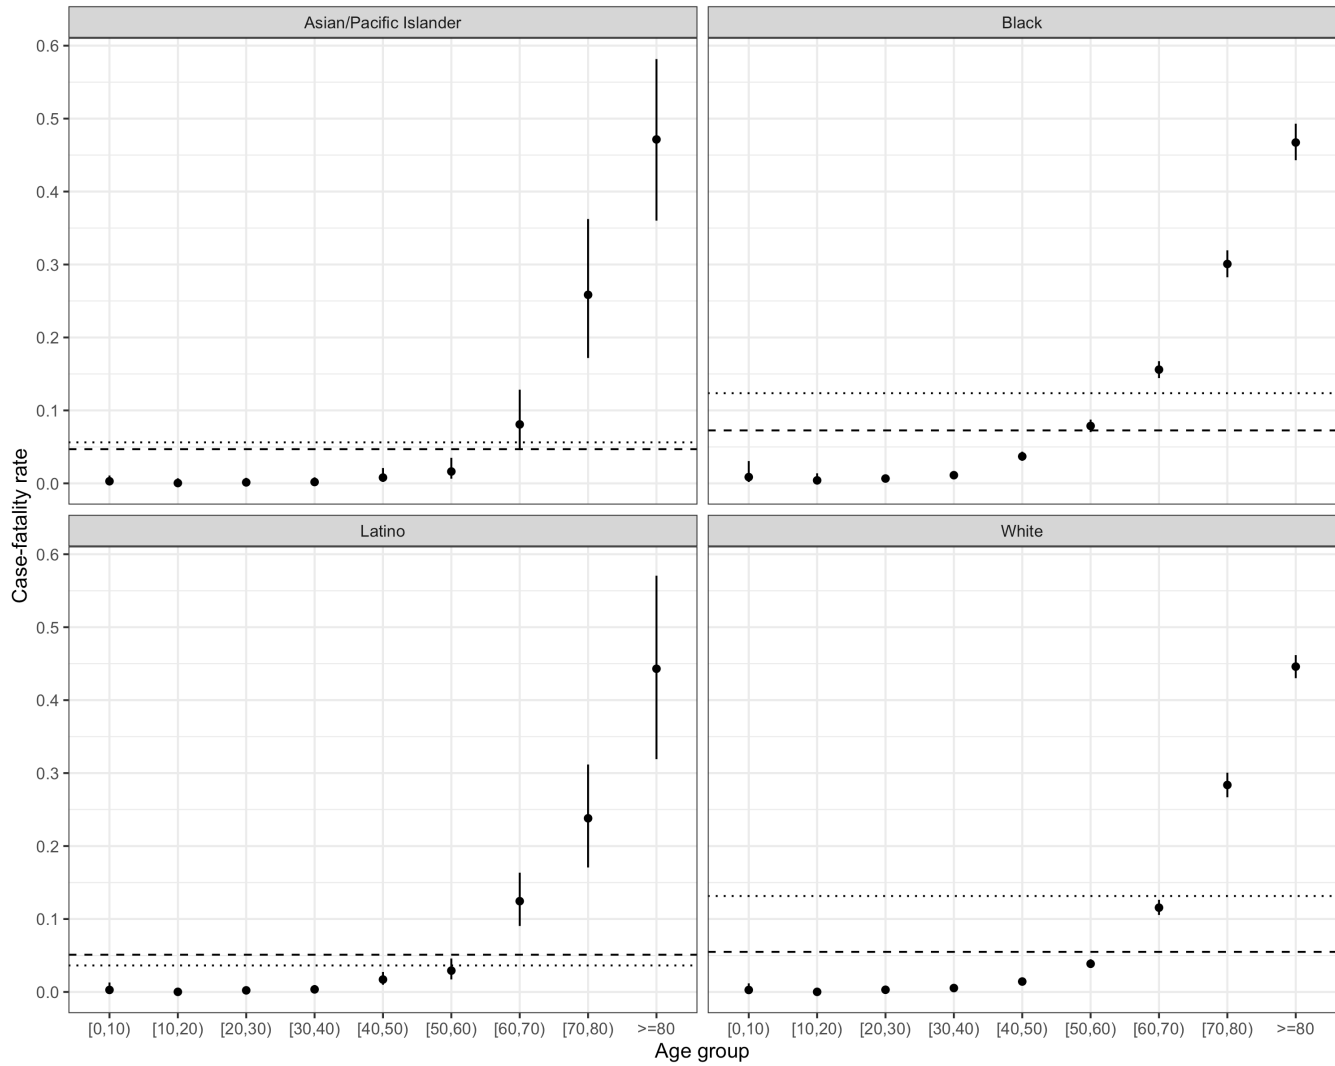

Figure 2: COVID-19 case-fatality rate by age and race. Dashed lines indicate the crude overall rate for each group, dotted lines indicate group-specific age and sex-adjusted rates.

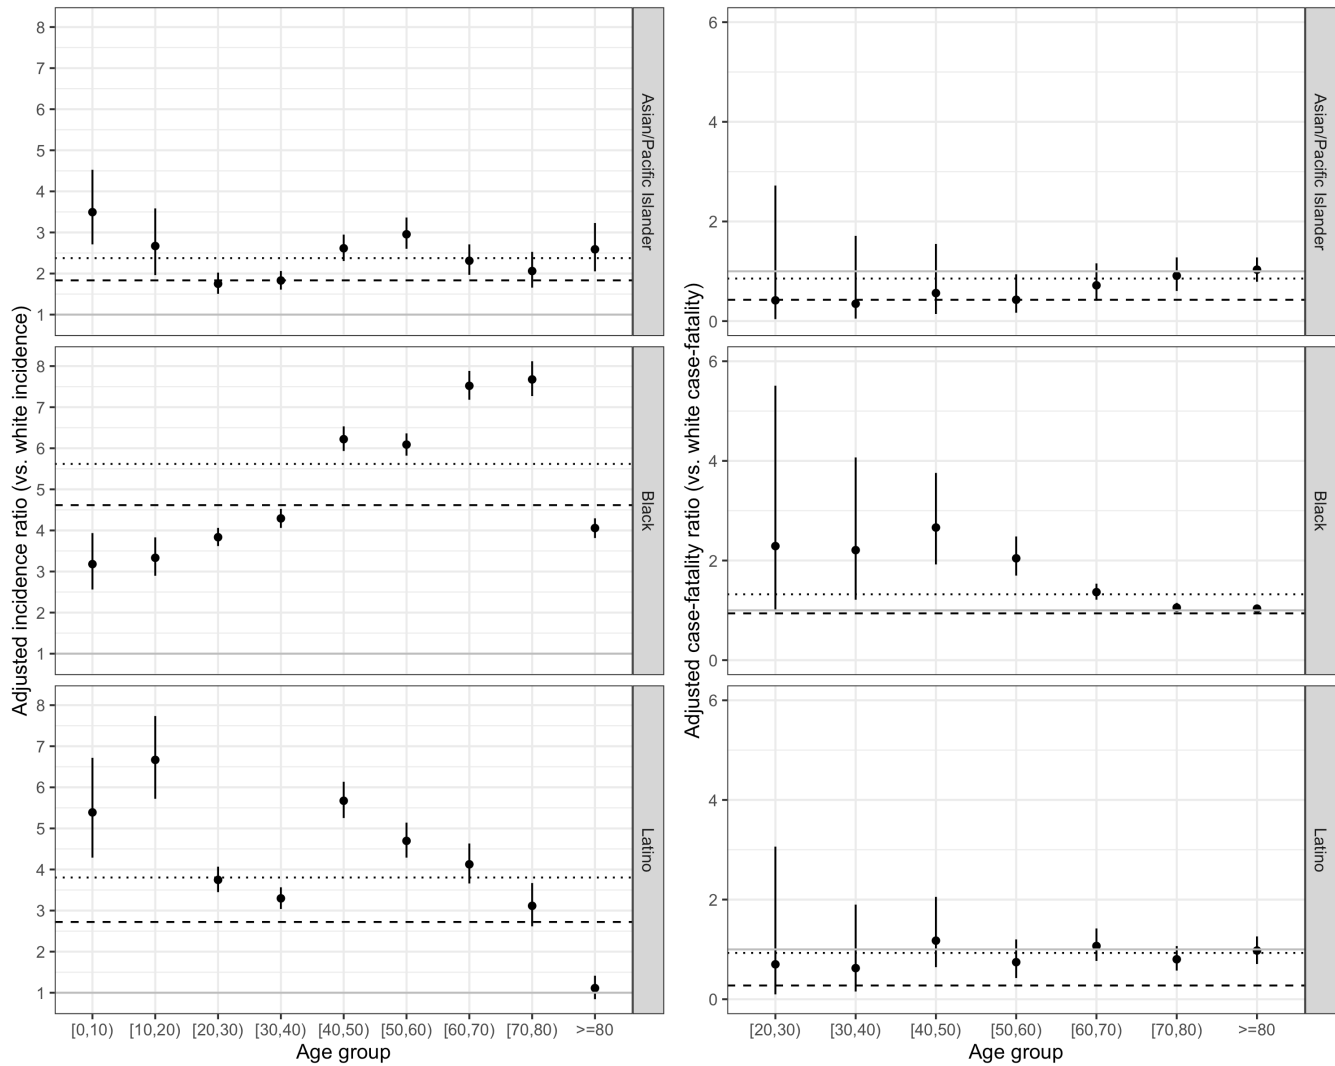

Figure 3: Disparities in COVID-19 incidence and case-fatality rate by age and race. Dashed lines indicate the ratio in the crude overall rate for each group, dotted lines indicate group-specific age and sex-adjusted rate ratios. The solid gray line is a guide for assessing the strength of association.



128 Islanders have similar crude mortality rates to Whites (Table 1), these results indicate that these rates would be  
129 significantly lower if their exposure risks were more similar to their White peers.

130 Another potential explanation for racial differences in crude incidence and mortality is that there may be differential  
131 risks by sex that vary over race/ethnic categories. However, the age-standardized results in Table 2 suggest this is  
132 unlikely to be the case. We also explicitly examined sex-specific differences in incidence, overall mortality and case-  
133 fatality (See Figure S1 in the supplementary materials), and found no meaningful differences by sex or race, although  
134 the risk of death from COVID-19 is significantly higher for men than for women across all groups, echoing other  
135 findings.

## 136 Discussion

137 Our results highlight yawning gaps in COVID-19 incidence and mortality in Michigan that cannot be explained  
138 away by differences in population age and sex composition. Our results also suggest that the stark differences in  
139 crude and adjusted mortality between Blacks and all other race/ethnic groups shown in Tables 1 & 2 are driven in  
140 large part by disparities in infection risk at all ages, and an extremely high rate of COVID-19 infection among older  
141 Blacks in particular. This group of individuals had a similar case-fatality rate to same-aged Whites, but reported  
142 infection rates 6-8 times greater than among their White counterparts. Some of this disparity is also driven by the  
143 higher case-fatality rate among middle-aged Blacks, as compared to same-aged Whites, in combination with the 5-6  
144 times greater risk of infection among middle-aged African-Americans as compared to Whites.

145 Despite these unambiguous results, the full extent of racial and socioeconomic disparities in COVID-19 outcomes in  
146 Michigan and the rest of the U.S. is likely to be even wider than is reflected in administrative data of the type analyzed  
147 here. Results from other hard-hit cities, states, and countries have indicated high rates of excess mortality reflective  
148 of unrecognized and unreported COVID-19 infection.<sup>19</sup> In a recent analysis using state-level data Weinberger et al.<sup>20</sup>  
149 estimated rates of excess mortality due to COVID-19. They found that there were approximately 4700 unreported  
150 deaths likely due to COVID-19 or another respiratory infection during the period from March 1 - May 30 2020, for  
151 a rate of 61/100,000 unreported deaths from COVID-19 above the reported totals. Of course, the damage to health  
152 from the pandemic is not only among infections and deaths from SARS-CoV-2: In other recent results, Woolf et  
153 al.<sup>21</sup> showed that 33% of the total excess deaths during the period from March 1-April 25 2020 in Michigan were  
154 attributable to non-infectious causes, with the remainder associated with respiratory infections, primarily COVID-  
155 19. Though these results are not broken down by race/ethnicity, it remains critically important to understand who is  
156 among these unreported deaths from COVID-19 as well as non-infectious illnesses. Beyond the delay in healthcare  
157 seeking of all risk averse individuals, it is quite likely that these patterns of excess death reflect underlying disparities  
158 in chronic illnesses that predispose individuals to mortality from COVID-19, lack of access to healthcare for Blacks,  
159 Latinx individuals and other minority groups, and variable quality of care delivered based on racial-ethnic identity.

160 When interpreting these and other results illustrating racial disparities in COVID-19 incidence and outcomes, it is  
161 key to not examine race as a risk factor independent of health conditions, wealth and other potentially modifiable  
162 risk factors<sup>22</sup> that may predispose individuals to COVID-19 infection and mortality. For example, McClure et al.<sup>23</sup>  
163 illustrate how a focus on - and adjustment for - individual-level “underlying conditions” obscures the role of racial  
164 inequality in shaping the prevalence of these chronic health conditions, and other factors such as intergenerational  
165 households, which may increase risk among racial and ethnic minority groups.

166 A strength of our analysis is the use of detailed case data obtained directly from the Michigan Disease Surveillance  
167 System. This allowed us to identify age and race-specific risks of COVID-19 infection and death. Nonetheless, there  
168 are some limitations that are important to highlight. First, our reliance on census-defined race/ethnicity as a proxy  
169 for exposure and mortality risk is necessarily reductive and does not shed enough light factors that can be modified to  
170 reduce these disparities. Numerous studies have highlighted the role of wealth and other markers of socioeconomic  
171 status (SES) such as educational attainment, as an important mediator of the effects of race on health outcomes. At the  
172 same time, even after adjustment for SES, there is often a residual effect of race which cannot be explained solely in  
173 terms of material wealth, and instead is likely accounted for by other factors including discrimination in healthcare  
174 settings, and the impact of cumulative stress associated with exposure to structural racism.<sup>24</sup> Future analyses are  
175 necessary using either prospectively collected data inclusive of SES, or spatial analyses that join neighborhood-level  
176 information on wealth and other markers of SES with individual-level case data.

177 In addition, although the disparities in our data likely mirror many of those nationwide, it is important to remember  
178 that these results reflect specifically patterns of infection and death in Michigan during the first wave of the COVID-  
179 19 pandemic in the U.S. Although its relatively large population size and socioeconomic and racial composition



180 make the state a bellwether of many national trends, patterns of racial residential segregation are more regional than  
181 in other hard-hit locales, such as New York City, Chicago, Los Angeles, and Atlanta.<sup>25</sup> While there is a substantial  
182 Latino and Asian population in Michigan, patterns of racial and socioeconomic diversity are not directly comparable  
183 to those of key centers of ongoing transmission such as Florida, Texas, and California. Consequently, similar analyses  
184 from these contexts are urgently needed.

185 Another important limitation of our results is the reliance on racial categorizations from the 2010 census as well  
186 as the documentation of race/ethnicity on case reports and death certificates. For example, the one exception to  
187 the pattern of disparate risks among non-whites was the finding of no difference in incidence and mortality risk  
188 for Native Americans in Michigan as compared to whites. These results may reflect the concerted effort to prevent  
189 transmission in Native communities.<sup>26</sup> However, this may also reflect the fact that cases among American Indians  
190 and Alaska Natives have disproportionately been categorized as occurring among the “Other” race/ethnic groups.<sup>27</sup>  
191 Other important groups are not included in census statistics. For example, there is a large Arab-American popula-  
192 tion in Southeast Michigan,<sup>28</sup> who experience many social and medical vulnerabilities that may put them at increase  
193 risk for COVID-19 infection and death.<sup>29</sup> However, the lack of available census data and uniform reporting of Arab  
194 ethnicity in medical records precludes rigorous analysis of COVID-19 infection and mortality risks among this im-  
195 portant group.

196 Because of the deep structural roots of the disparities identified in this analysis, it is easy - but wrongheaded - to  
197 conclude that there is nothing to be done. The fluid nature of the COVID-19 pandemic and its response provides  
198 opportunities to slow the tide of transmission and death. For this to be the case, however, similar amounts of effort  
199 to what is being done to ensure that college campuses and other workplaces can re-open safely needs to be focused  
200 on increasing the quality and quantity of testing, healthcare and social support among people of color. Further, there  
201 is a need to examine the racialized dismantling of public infrastructure and systematic divestment which drives  
202 disparities in both exposure, susceptibility and mortality.<sup>30</sup> However, while understanding the causes of disparate  
203 outcomes is important, it does not necessarily instruct us on what to do next. If the current pandemic teaches us  
204 something, it is that closing the gap in infection and mortality during the current catastrophe - and preventing such  
205 inequities in the next one - requires a re-orientation around an ‘epidemiology of consequence’<sup>31</sup> that is focused on  
206 identifying strategies to attack the structural and practical barriers to health equity before the next disaster strikes.

## References

1. DiMaggio, C., Klein, M., Berry, C. & Frangos, S. *Blacks/African Americans are 5 Times More Likely to Develop COVID-19: Spatial Modeling of New York City ZIP Code-level Testing Results.* (2020) doi:10.1101/2020.05.14.20101691.
2. Mahajan, U. V. & Larkins-Pettigrew, M. Racial demographics and COVID-19 confirmed cases and deaths: A correlational analysis of 2886 US counties. *Journal of Public Health* fdaa070 (2020) doi:10.1093/pubmed/fdaa070.
3. Patel, A. P., Paranjpe, M. D., Kathiresan, N. P., Rivas, M. A. & Khera, A. V. *Race, Socioeconomic Deprivation, and Hospitalization for COVID-19 in English participants of a National Biobank.* (2020) doi:10.1101/2020.04.27.20082107.
4. Rodriguez-Lonebear, D., Barceló, N. E., Akee, R. & Carroll, S. R. American Indian Reservations and COVID-19: Correlates of Early Infection Rates in the Pandemic. *Journal of Public Health Management and Practice* **26**, 371–377 (2020).
5. McLaren, J. *Racial Disparity in COVID-19 Deaths: Seeking Economic Roots with Census data.* (2020) doi:10.3386/w27407.
6. Moran, E., Kubale, J., Noppert, G., Malosh, R. E. & Zelner, J. L. Inequality in acute respiratory infection outcomes in the United States: A review of the literature and its implications for public health policy and practice. *medRxiv* 2020.04.22.20069781 (2020) doi:10.1101/2020.04.22.20069781.
7. Saloner, B., Parish, K., Ward, J. A., DiLaura, G. & Dolovich, S. COVID-19 Cases and Deaths in Federal and State Prisons. *JAMA* (2020) doi:10.1001/jama.2020.12528.
8. Kajeepeta, S., Rutherford, C. G., Keyes, K. M., El-Sayed, A. M. & Prins, S. J. County Jail Incarceration Rates and County Mortality Rates in the United States, 1987. *Am J Public Health* **110**, S109–S115 (2020).
9. Acevedo-Garcia, D. Residential segregation and the epidemiology of infectious diseases. *Social Science & Medicine* **51**, 1143–1161 (2000).
10. Roberts, S. K. *Infectious Fear: Politics, Disease, and the Health Effects of Segregation.* (University of North Carolina Press, 2009).
11. Yancy, C. W. COVID-19 and African Americans. *JAMA* **323**, 1891–1892 (2020).
12. Meyerowitz-Katz, G. & Merone, L. A systematic review and meta-analysis of published research data on COVID-19 infection-fatality rates. *medRxiv* 2020.05.03.20089854 (2020) doi:10.1101/2020.05.03.20089854.
13. Nepomuceno, M. R. *et al.* Besides population age structure, health and other demographic factors can contribute to understanding the COVID-19 burden. *Proc Natl Acad Sci USA* **117**, 13881–13883 (2020).
14. Millett, G. A. *et al.* Assessing differential impacts of COVID-19 on black communities. *Annals of Epidemiology* **47**, 37–44 (2020).
15. Lipsitch, M. *et al.* Potential Biases in Estimating Absolute and Relative Case-Fatality Risks during Outbreaks. *PLOS Neglected Tropical Diseases* **9**, e0003846 (2015).
16. Gabry, J. *et al.* Rstanarm: Bayesian Applied Regression Modeling via Stan. (2020).
17. Kay, M. & Mastny, T. Tidybayes: Tidy Data and ‘Geoms’ for Bayesian Models. (2020).
18. Wickham, H. *et al.* Ggplot2: Create Elegant Data Visualisations Using the Grammar of Graphics. (2020).
19. New York City Department of Health and Mental Hygiene (DOHMH) COVID-19 Response Team *et al.* Preliminary Estimate of Excess Mortality During the COVID-19 Outbreak New York City, March 11–May 2, 2020. *MMWR Morb. Mortal. Wkly. Rep.* **69**, (2020).
20. Weinberger, D. M. *et al.* Estimation of Excess Deaths Associated With the COVID-19 Pandemic in the United States, March to May 2020. *JAMA Intern Med* (2020) doi:10.1001/jamainternmed.2020.3391.
21. Woolf, S. H., Chapman, D. A., Sabo, R. T., Weinberger, D. M. & Hill, L. Excess Deaths From COVID-19 and Other Causes, March–April 2020. *JAMA* (2020) doi:10.1001/jama.2020.11787.
22. Sen, M. & Wasow, O. Race as a Bundle of Sticks: Designs that Estimate Effects of Seemingly Immutable Characteristics. *Annual Review of Political Science* **19**, 499–522 (2016).
23. McClure, E. S., Vasudevan, P., Bailey, Z., Patel, S. & Robinson, W. R. Racial Capitalism within Public Health: How Occupational Settings Drive COVID-19 Disparities. *American Journal of Epidemiology* kwaa126 (2020) doi:10.1093/aje/kwaa126.

- 253 24. Williams, D. R. & Collins, C. Racial residential segregation: A fundamental cause of racial disparities in health.  
254 *Public Health Reports* **116**, 404–416 (2001).
- 255 25. Lichter, D. T., Parisi, D. & Taquino, M. C. Toward a New Macro-Segregation? Decomposing Segregation within  
256 and between Metropolitan Cities and Suburbs. *Am Sociol Rev* **80**, 843–873 (2015).
- 257 26. Close, R. M. & Stone, M. J. Contact Tracing for Native Americans in Rural Arizona. *New England Journal of*  
258 *Medicine* **383**, e15 (2020).
- 259 27. Nagle, R. Native Americans being left out of US coronavirus data and labelled as 'other'. *the Guardian* (2020).
- 260 28. Census Counts. Arab American Demographics Factsheet. *Census Counts* (2018).
- 261 29. Abuelezam, N. N. Health Equity During COVID-19: The Case of Arab Americans. *Am J Prev Med* (2020)  
262 doi:10.1016/j.amepre.2020.06.004.
- 263 30. Bailey, Z. D. & Moon, J. R. Racism and the Political Economy of COVID-19: Will We Continue to Resurrect the  
264 Past? *Journal of Health Politics, Policy and Law* 8641481 (2020) doi:10.1215/03616878-8641481.
- 265 31. Keyes, K. & Galea, S. What matters most: Quantifying an epidemiology of consequence. *Annals of Epidemiology*  
266 **25**, 305–311 (2015).

## Supplementary Materials

### Supplementary Results

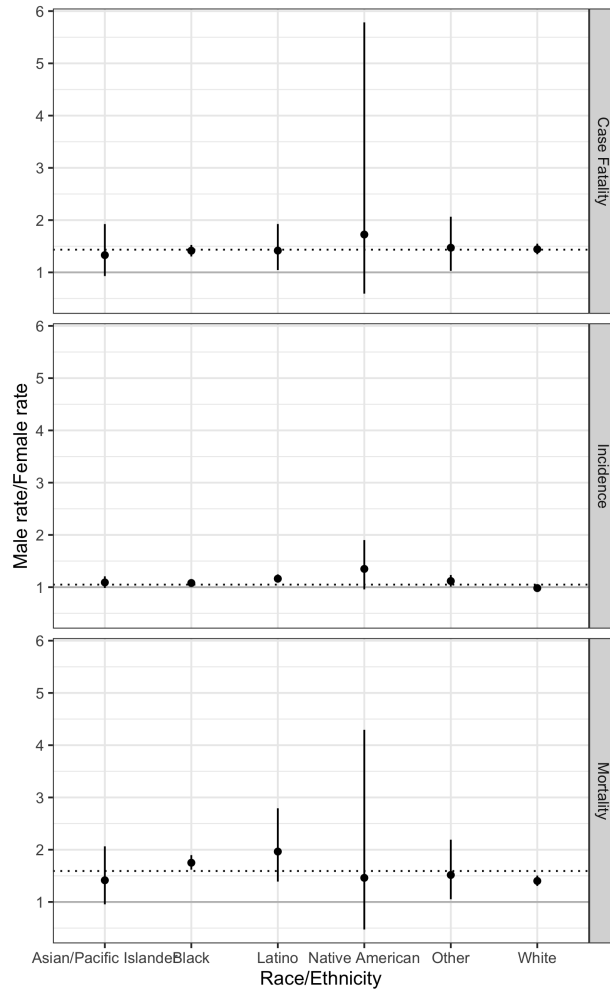

Figure S1: Male vs. female risk ratios for key COVID-19 risks.

### Posterior Predictive Checks

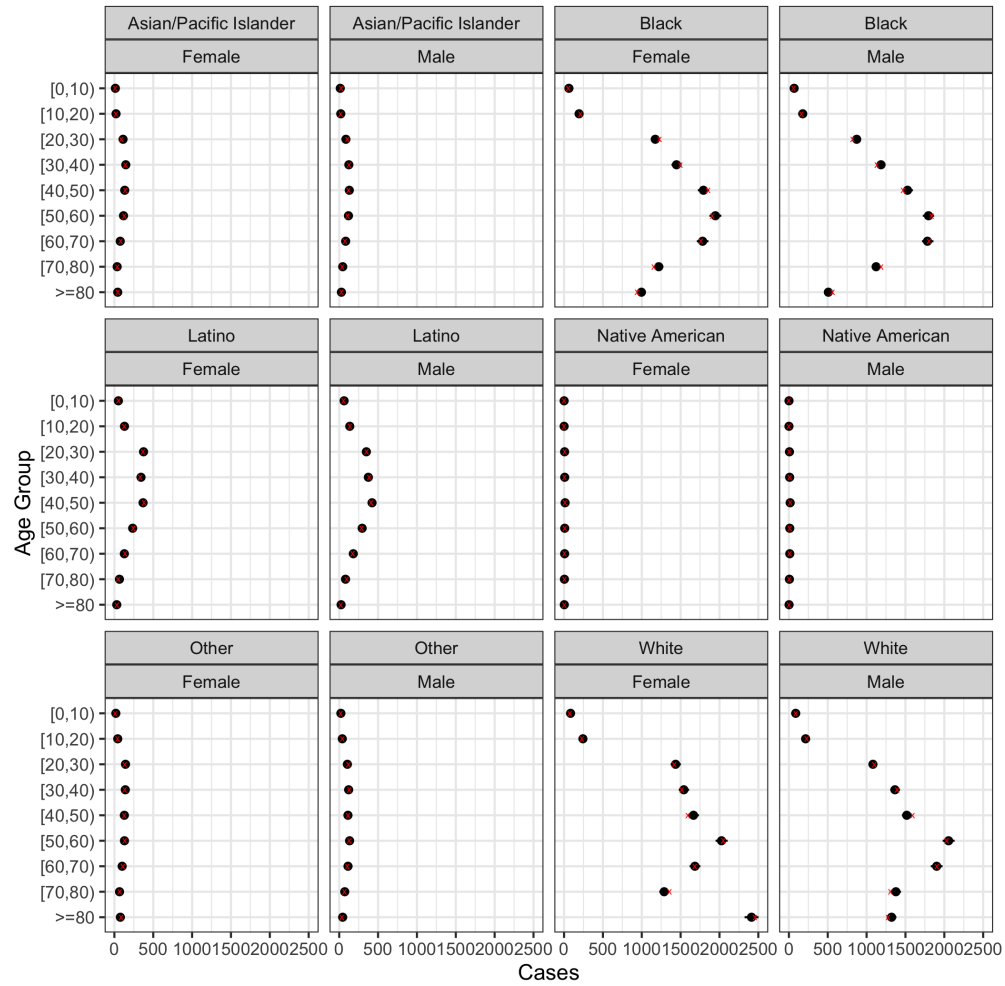

Figure S2: Posterior predictive check for number of incident cases. Circles indicate predicted counts, x indicates raw counts.

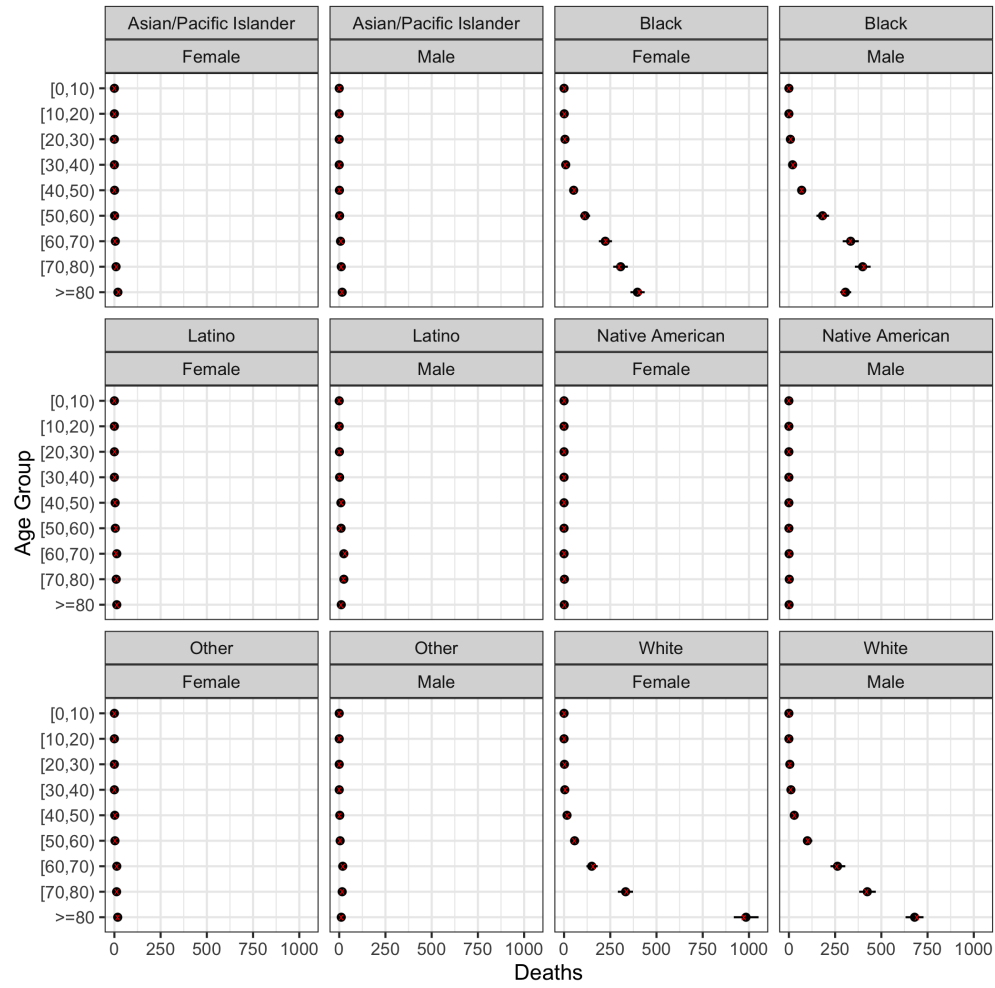

Figure S3: Posterior predictive check for number of deaths. Circles indicate predicted counts, x indicates raw counts.
